# Supplementary material for: Evaluation of the MeroRisk Calculator, A User-Friendly Tool to Predict the Risk of Meropenem Target Non-Attainment in Critically Ill Patients
Source: MDPI journal article supplement (doi:10.3390/antibiotics10040468), 2021-04-20
Supplement: s1 [file s1]

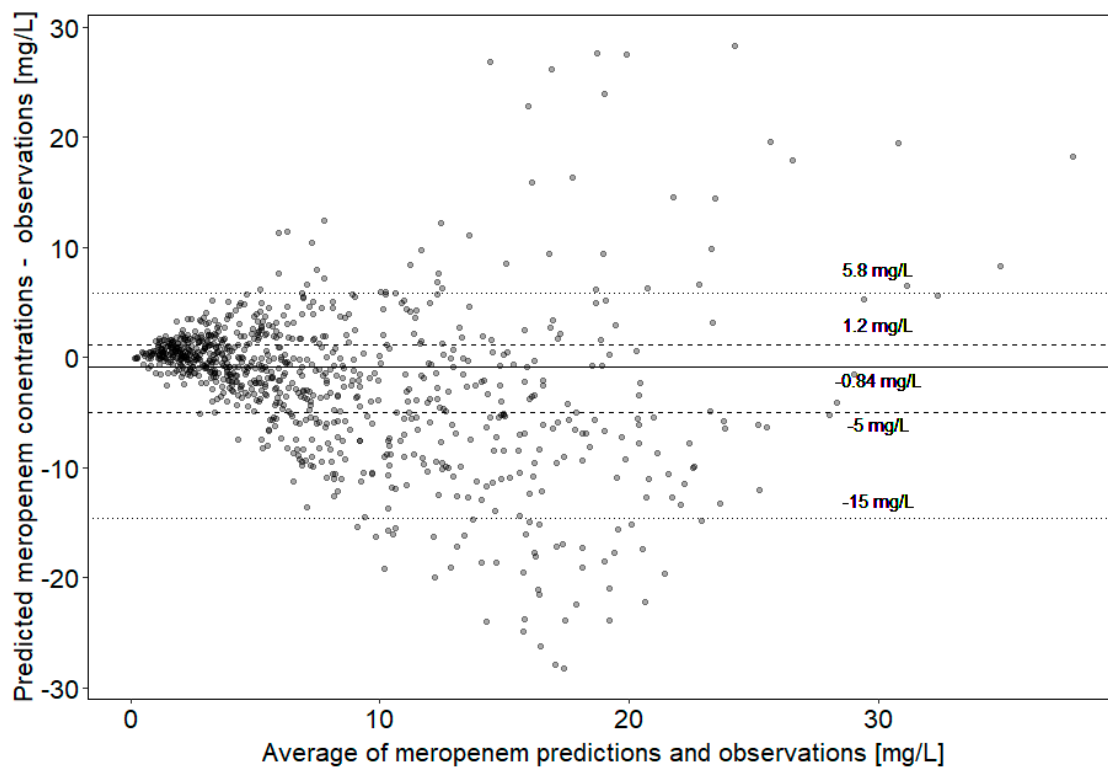

**Figure A1: Bland-Altman plot for observed and median predicted meropenem concentrations.** Median predictions are based on 1000 stochastic simulations of the investigated pharmacokinetic model. *Solid Line*: median of deviations between observed and median predicted concentrations. *Dashed Lines*: 50% prediction error interval, *Dotted Line*: 90% prediction error interval.
