# Supplementary material for: Evaluation of the MeroRisk Calculator, A User-Friendly Tool to Predict the Risk of Meropenem Target Non-Attainment in Critically Ill Patients
Source: Antibiotics (Basel). 2021 Apr 20;10(4):468. doi: 10.3390/antibiotics10040468 (PMC8074046; doi:10.3390/antibiotics10040468)
Supplement: Supplementary file 1 [file antibiotics-10-00468-s001.zip › Appendix_B.xlsm]

## Sheet: MRc
	Step 1: Patient-related data
	For original patient characteristics:
	A: Creatinine clearance
	CLCRCG* [mL/min]:
	*estimated according to Cockcroft and Gault
	OR
	B: Determinants of creatinine clearance:
	Sex [m/f]:
	Age [years]:
	Weight:
	Serum creatinine:
	Step 2: Microbiological data
	Pathogen
	MIC [mg/L]#:
	#leave blank if MIC is unknown
	Step 3: Risk of target non-attainment

## Sheet: Disclaimer
	Please send feedback to:	mrc@pharmazie.fu-berlin.de

## Sheet: Data
rechtes diagramm			Punkt			MIC			graue Fläche	blaue Fläche									MIC Distribution selected Phatogens												Unknown/Other	1	1	Unknown/Other					Acinetobacter baumannii	Acinetobacter lwoffii	Acinetobacter spp	Actinomyces israelii	Actinomyces spp	Aerococcus sanguinicola	Aerococcus spp	Aerococcus urinae	Anaerobic cocci Gram positive	Bacteroides distasonis	Bacteroides fragilis
x	kurve		CLCR	C8h		0	300						PIupC8h	PIlowC8h	CLCRCG	SigmaC8h			MIC	Escherichia coli	Klebsiella pneumoniae	Enterobacter cloacae	Pseudomonas aeroginosa	Acinetobacter spp.	Not known						Acinetobacter baumannii	1	2	Acinetobacter baumannii				0.002	0	0	0	0	8	0	0	0	0	1	3
24.8179	27.4723												62.4573	12.0839	24.8179	0.416704			0.002	0	0	69	0	0							Acinetobacter lwoffii	1	3	Acinetobacter lwoffii				0.004	0	0	0	47	76	0	0	0	0	0	17
24.9154	27.2288								0	0			61.9908	11.96	24.9154	0.417417			0.004	0	0	216	0	0							Acinetobacter spp	1	4	Acinetobacter spp				0.008	1	3	1	28	60	0	1	1	0	8	105
25.0133	26.9874								0	0			61.5279	11.8373	25.0133	0.418132			0.008	953	271	524	7	1							Actinomyces israelii	1	5	Actinomyces israelii				0.016	15	2	6	12	53	0	3	3	26	10	303
25.1116	26.7482								0	0			61.0688	11.7158	25.1116	0.418849			0.016	3751	989	486	40	3							Actinomyces spp	1	6	Actinomyces spp				0.032	41	2	13	3	24	9	17	8	30	58	925
25.2102	26.5111								0	0			60.6134	11.5955	25.2102	0.419568			0.032	2381	2878	614	144	6							Aerococcus sanguinicola	1	7	Aerococcus sanguinicola				0.064	119	88	434	5	31	16	33	17	22	100	828
25.3093	26.2761								0	0			60.1616	11.4763	25.3093	0.42029			0.064	286	11766	4514	2592	424							Aerococcus spp	1	8	Aerococcus spp				0.125	418	58	516	1	29	5	6	1	19	68	646
25.4087	26.0432								0	0			59.7135	11.3584	25.4087	0.421014			0.125	76	1017	846	5929	505							Aerococcus urinae	1	9	Aerococcus urinae				0.25	913	93	1492	1	16	0	0	0	12	38	220
25.5085	25.8124								0	0			59.2689	11.2416	25.5085	0.421739			0.25	41	354	320	10727	1466							Anaerobic cocci Gram positive	1	10	Anaerobic cocci Gram positive				0.5	967	53	1541	1	7	0	0	0	1	3	112
25.6087	25.5836								0	0			58.8279	11.126	25.6087	0.422467			0.5	12	187	146	11880	1531							Bacteroides distasonis	1	11	Bacteroides distasonis				1	907	34	1728	0	1	0	0	0	2	6	50
25.7093	25.3568								0	0			58.3904	11.0115	25.7093	0.423198			1	8	128	70	8751	1725							Bacteroides fragilis	1	12	Bacteroides fragilis				2	714	28	1610	0	0	0	0	0	0	3	42
25.8103	25.1321								0	0			57.9564	10.8982	25.8103	0.42393			2	1	78	31	5164	1610							Bacteroides fragilis group	1	13	Bacteroides fragilis group				4	319	10	520	0	0	0	0	0	0	2	17
25.9117	24.9093								0	0			57.5259	10.786	25.9117	0.424664			4	1	49	14	3770	520							Bacteroides ovatus	1	14	Bacteroides ovatus				8	264	4	333	0	0	0	0	0	0	0	4
26.0135	24.6885								0	0			57.0989	10.6749	26.0135	0.425401			8	0	32	15	3248	333							Bacteroides thetaiotaomicron	1	15	Bacteroides thetaiotaomicron				16	570	18	1198	0	0	0	0	0	0	0	4
26.1157	24.4697								0	0			56.6752	10.5648	26.1157	0.42614			16	0	33	14	3927	1197							Bacteroides uniformis	1	16	Bacteroides uniformis				32	62	6	10	0	0	0	0	0	0	0	2
26.2183	24.2528								0	0			56.255	10.4559	26.2183	0.426881			32	0	4	0	391	8							Bacteroides ureolyticus	1	17	Bacteroides ureolyticus				64	59	1	1	0	0	0	0	0	0	0	3
26.3213	24.0378								0	0			55.8381	10.3481	26.3213	0.427624			64	0	1	2	443	1							Bacteroides vulgatus	1	18	Bacteroides vulgatus				128	54	0	0	0	0	0	0	0	0	0	3
26.4247	23.8247								0	0			55.4245	10.2413	26.4247	0.428369			128	0	0	0	33	0							Burkholderia cepacia	1	19	Burkholderia cepacia				256	8	0	0	0	0	0	0	0	0	0	0
26.5286	23.6136								0	0			55.0142	10.1356	26.5286	0.429117			256	0	0	0	14	0							Citrobacter freundii	1	20	Citrobacter freundii				512	10	0	0	0	0	0	0	0	0	0	0
26.6328	23.4043								0	0			54.6072	10.0309	26.6328	0.429867			512	0	0	0	0	0							Citrobacter koseri	1	21	Citrobacter koseri
26.7374	23.1968								0	0			54.2034	9.92726	26.7374	0.430618															Citrobacter spp	1	22	Citrobacter spp
26.8425	22.9912								0	0			53.8029	9.82465	26.8425	0.431372															Clostridium difficile	1	23	Clostridium difficile
26.9479	22.7874								0	0			53.4055	9.72306	26.9479	0.432129															Enterobacter cloacae	1	24	Enterobacter cloacae
27.0538	22.5854								0	0			53.0113	9.62249	27.0538	0.432887															Enterobacter spp	1	25	Enterobacter spp
27.1601	22.3852								0	0			52.6203	9.52291	27.1601	0.433648															Enterococcus faecalis	1	26	Enterococcus faecalis
27.2668	22.1868								0	0			52.2323	9.42432	27.2668	0.43441															Enterococcus faecium	1	27	Enterococcus faecium
27.3739	21.9901								0	0			51.8475	9.32671	27.3739	0.435175															Escherichia coli	1	28	Escherichia coli
27.4814	21.7952								0	0			51.4657	9.23007	27.4814	0.435943															Haemophilus influenzae	1	29	Haemophilus influenzae
27.5894	21.602								0	0			51.0869	9.1344	27.5894	0.436712															Kingella kingae	1	30	Kingella kingae
27.6978	21.4106								0	0			50.7111	9.03968	27.6978	0.437483															Klebsiella aerogenes	1	31	Klebsiella aerogenes
27.8066	21.2208								0	0			50.3383	8.9459	27.8066	0.438257															Klebsiella oxytoca	1	32	Klebsiella oxytoca
27.9159	21.0327								0	0			49.9685	8.85305	27.9159	0.439033															Klebsiella pneumoniae	1	33	Klebsiella pneumoniae
28.0255	20.8462								0	0			49.6016	8.76113	28.0255	0.439811															Klebsiella spp	1	34	Klebsiella spp
28.1356	20.6615								0	0			49.2376	8.67013	28.1356	0.440591															Listeria monocytogenes	1	35	Listeria monocytogenes
28.2462	20.4783								0	0			48.8765	8.58004	28.2462	0.441374															Moraxella catarrhalis	1	36	Moraxella catarrhalis
28.3571	20.2968								0	0			48.5182	8.49085	28.3571	0.442159															Morganella morganii	1	37	Morganella morganii
28.4685	20.1169								0	0			48.1628	8.40254	28.4685	0.442945															Neisseria gonorrhoeae	1	38	Neisseria gonorrhoeae
28.5804	19.9386								0	0			47.8102	8.31512	28.5804	0.443734															Neisseria meningitidis	1	39	Neisseria meningitidis
28.6927	19.7619								0	0			47.4604	8.22858	28.6927	0.444526															Peptostreptococcus spp	1	40	Peptostreptococcus spp
28.8054	19.5867								0	0			47.1133	8.14289	28.8054	0.445319															Proteus mirabilis	1	41	Proteus mirabilis
28.9186	19.4131								0	0			46.769	8.05807	28.9186	0.446115															Proteus vulgaris	1	42	Proteus vulgaris
29.0322	19.241								0	0			46.4274	7.9741	29.0322	0.446913															Providencia rettgeri	1	43	Providencia rettgeri
29.1462	19.0705								0	0			46.0885	7.89096	29.1462	0.447713															Providencia spp	1	44	Providencia spp
29.2607	18.9014								0	0			45.7522	7.80866	29.2607	0.448515															Providencia stuartii	1	45	Providencia stuartii
29.3757	18.7339								0	0			45.4186	7.72718	29.3757	0.44932															Pseudomonas aeruginosa	1	46	Pseudomonas aeruginosa
29.4911	18.5678								0	0			45.0877	7.64652	29.4911	0.450126															Pseudomonas fluorescens group	1	47	Pseudomonas fluorescens group
29.607	18.4032								0	0			44.7593	7.56667	29.607	0.450935															Salmonella enteritidis	1	48	Salmonella enteritidis
29.7233	18.2401								0	0			44.4336	7.48762	29.7233	0.451746															Salmonella spp	1	49	Salmonella spp
29.8401	18.0784								0	0			44.1104	7.40937	29.8401	0.452559															Salmonella typhi	1	50	Salmonella typhi
29.9573	17.9182								0	0			43.7897	7.3319	29.9573	0.453375															Salmonella typhimurium	1	51	Salmonella typhimurium
30.075	17.7594								0	0			43.4716	7.25521	30.075	0.454193															Serratia liquefaciens	1	52	Serratia liquefaciens
30.1931	17.602								0	0			43.1559	7.17929	30.1931	0.455013															Serratia marcescens	1	53	Serratia marcescens
30.3118	17.4459								0	0			42.8428	7.10413	30.3118	0.455835															Shigella flexneri	1	54	Shigella flexneri
30.4308	17.2913								0	0			42.5321	7.02973	30.4308	0.456659															Shigella sonnei	1	55	Shigella sonnei
30.5504	17.138								0	0			42.2238	6.95608	30.5504	0.457486															Staphylococcus aureus	1	56	Staphylococcus aureus
30.6704	16.9861								0	0			41.918	6.88316	30.6704	0.458315															Staphylococcus capitis	1	57	Staphylococcus capitis
30.7909	16.8356								0	0			41.6145	6.81099	30.7909	0.459146															Staphylococcus coagulase negative	1	58	Staphylococcus coagulase negative
30.9119	16.6863								0	0			41.3135	6.73954	30.9119	0.459979															Staphylococcus epidermidis	1	59	Staphylococcus epidermidis
31.0333	16.5384								0	0			41.0147	6.66881	31.0333	0.460814															Staphylococcus haemolyticus	1	60	Staphylococcus haemolyticus
31.1552	16.3918								0	0			40.7184	6.59879	31.1552	0.461652															Staphylococcus hominis	1	61	Staphylococcus hominis
31.2776	16.2465								0	0			40.4243	6.52949	31.2776	0.462492															Staphylococcus lugdunensis	1	62	Staphylococcus lugdunensis
31.4005	16.1025								0	0			40.1326	6.46088	31.4005	0.463334															Staphylococcus saprophyticus	1	63	Staphylococcus saprophyticus
31.5239	15.9598								0	0			39.8431	6.39296	31.5239	0.464179															Staphylococcus simulans	1	64	Staphylococcus simulans
31.6477	15.8183								0	0			39.5559	6.32573	31.6477	0.465025															Staphylococcus warneri	1	65	Staphylococcus warneri
31.7721	15.6781								0	0			39.2709	6.25918	31.7721	0.465874															Staphylococcus xylosis	1	66	Staphylococcus xylosis
31.8969	15.5392								0	0			38.9882	6.1933	31.8969	0.466725															Stenotrophomonas maltophilia	1	67	Stenotrophomonas maltophilia
32.0222	15.4014								0	0			38.7076	6.12809	32.0222	0.467579															Streptococcus agalactiae	1	68	Streptococcus agalactiae
32.148	15.2649								0	0			38.4293	6.06354	32.148	0.468434															Streptococcus anginosus	1	69	Streptococcus anginosus
32.2743	15.1296								0	0			38.1531	5.99964	32.2743	0.469292															Streptococcus group G	1	70	Streptococcus group G
32.4011	14.9955								0	0			37.8791	5.93639	32.4011	0.470152															Streptococcus mitis	1	71	Streptococcus mitis
32.5284	14.8626								0	0			37.6072	5.87378	32.5284	0.471014															Streptococcus oralis	1	72	Streptococcus oralis
32.6562	14.7308								0	0			37.3374	5.8118	32.6562	0.471879															Streptococcus pneumoniae	1	73	Streptococcus pneumoniae
32.7845	14.6003								0	0			37.0697	5.75045	32.7845	0.472746															Streptococcus pyogenes	1	74	Streptococcus pyogenes
32.9133	14.4708								0	0			36.8041	5.68973	32.9133	0.473615															Streptococcus, viridans group	1	75	Streptococcus, viridans group
33.0426	14.3426								0	0			36.5406	5.62962	33.0426	0.474486
33.1724	14.2155								0	0			36.2791	5.57012	33.1724	0.475359
33.3027	14.0894								0	0			36.0197	5.51123	33.3027	0.476235
33.4336	13.9646								0	0			35.7622	5.45293	33.4336	0.477113
33.5649	13.8408								0	0			35.5068	5.39523	33.5649	0.477993
33.6968	13.7181								0	0			35.2533	5.33811	33.6968	0.478876
33.8292	13.5965								0	0			35.0018	5.28158	33.8292	0.479761
33.9621	13.476								0	0			34.7523	5.22562	33.9621	0.480648
34.0955	13.3565								0	0			34.5047	5.17023	34.0955	0.481537
34.2294	13.2381								0	0			34.259	5.1154	34.2294	0.482429
34.3639	13.1208								0	0			34.0152	5.06114	34.3639	0.483323
34.4989	13.0045								0	0			33.7733	5.00742	34.4989	0.484219
34.6345	12.8892								0	0			33.5332	4.95426	34.6345	0.485117
34.7705	12.775								0	0			33.2951	4.90164	34.7705	0.486018
34.9071	12.6618								0	0			33.0587	4.84955	34.9071	0.486921
35.0443	12.5495								0	0			32.8242	4.798	35.0443	0.487826
35.1819	12.4383								0	0			32.5915	4.74697	35.1819	0.488733
35.3202	12.328								0	0			32.3606	4.69647	35.3202	0.489643
35.4589	12.2188								0	0			32.1314	4.64648	35.4589	0.490555
35.5982	12.1105								0	0			31.9041	4.597	35.5982	0.491469
35.7381	12.0031								0	0			31.6785	4.54803	35.7381	0.492386
35.8785	11.8967								0	0			31.4546	4.49956	35.8785	0.493305
36.0194	11.7913								0	0			31.2324	4.45159	36.0194	0.494226
36.161	11.6867								0	0			31.012	4.40411	36.161	0.49515
36.303	11.5832								0	0			30.7932	4.35711	36.303	0.496075
36.4456	11.4805								0	0			30.5762	4.3106	36.4456	0.497003
36.5888	11.3787								0	0			30.3608	4.26456	36.5888	0.497934
36.7326	11.2779								0	0			30.147	4.219	36.7326	0.498866
36.8769	11.1779								0	0			29.9349	4.17391	36.8769	0.499801
37.0218	11.0788								0	0			29.7244	4.12927	37.0218	0.500738
37.1672	10.9806								0	0			29.5155	4.0851	37.1672	0.501678
37.3132	10.8833								0	0			29.3083	4.04138	37.3132	0.50262
37.4598	10.7868								0	0			29.1026	3.99811	37.4598	0.503564
37.607	10.6912								0	0			28.8985	3.95529	37.607	0.50451
37.7547	10.5964								0	0			28.696	3.91291	37.7547	0.505459
37.9031	10.5025								0	0			28.495	3.87096	37.9031	0.50641
38.052	10.4094								0	0			28.2955	3.82945	38.052	0.507363
38.2015	10.3172								0	0			28.0976	3.78836	38.2015	0.508319
38.3515	10.2257								0	0			27.9012	3.7477	38.3515	0.509277
38.5022	10.1351								0	0			27.7062	3.70746	38.5022	0.510237
38.6535	10.0452								0	0			27.5128	3.66763	38.6535	0.5112
38.8053	9.95619								0	0			27.3208	3.62821	38.8053	0.512165
38.9578	9.86794								0	0			27.1303	3.5892	38.9578	0.513132
39.1108	9.78048								0	0			26.9413	3.5506	39.1108	0.514102
39.2645	9.69378								0	0			26.7537	3.51239	39.2645	0.515074
39.4188	9.60786								0	0			26.5675	3.47458	39.4188	0.516048
39.5736	9.5227								0	0			26.3828	3.43716	39.5736	0.517025
39.7291	9.43829								0	0			26.1994	3.40012	39.7291	0.518004
39.8852	9.35463								0	0			26.0175	3.36348	39.8852	0.518985
40.0419	9.27171								0	0			25.8369	3.32721	40.0419	0.519969
40.1992	9.18953								0	0			25.6577	3.29131	40.1992	0.520955
40.3571	9.10807								0	0			25.4799	3.25579	40.3571	0.521943
40.5157	9.02734								0	0			25.3034	3.22064	40.5157	0.522934
40.6748	8.94733								0	0			25.1282	3.18585	40.6748	0.523927
40.8346	8.86802								0	0			24.9544	3.15142	40.8346	0.524922
40.9951	8.78941								0	0			24.7819	3.11735	40.9951	0.52592
41.1561	8.7115								0	0			24.6107	3.08363	41.1561	0.52692
41.3178	8.63429								0	0			24.4408	3.05027	41.3178	0.527922
41.4801	8.55775								0	0			24.2722	3.01725	41.4801	0.528927
41.6431	8.4819								0	0			24.1048	2.98458	41.6431	0.529934
41.8067	8.40672								0	0			23.9387	2.95224	41.8067	0.530944
41.9709	8.3322								0	0			23.7739	2.92024	41.9709	0.531955
42.1358	8.25835								0	0			23.6103	2.88858	42.1358	0.53297
42.3014	8.18515								0	0			23.448	2.85724	42.3014	0.533986
42.4676	8.11259								0	0			23.2869	2.82624	42.4676	0.535005
42.6344	8.04069								0	0			23.127	2.79555	42.6344	0.536027
42.8019	7.96941								0	0			22.9683	2.76519	42.8019	0.53705
42.9701	7.89877								0	0			22.8108	2.73514	42.9701	0.538077
43.1389	7.82876								0	0			22.6545	2.70541	43.1389	0.539105
43.3083	7.75937								0	0			22.4993	2.67598	43.3083	0.540136
43.4785	7.69059								0	0			22.3454	2.64687	43.4785	0.541169
43.6493	7.62242								0	0			22.1925	2.61806	43.6493	0.542205
43.8208	7.55486								0	0			22.0409	2.58955	43.8208	0.543243
43.9929	7.48789								0	0			21.8904	2.56133	43.9929	0.544284
44.1658	7.42152								0	0			21.741	2.53342	44.1658	0.545326
44.3393	7.35574								0	0			21.5927	2.50579	44.3393	0.546372
44.5135	7.29054								0	0			21.4455	2.47846	44.5135	0.547419
44.6884	7.22592								0	0			21.2995	2.45141	44.6884	0.548469
44.8639	7.16187								0	0			21.1545	2.42465	44.8639	0.549522
45.0402	7.09838								0	0			21.0107	2.39817	45.0402	0.550577
45.2171	7.03547								0	0			20.8679	2.37196	45.2171	0.551634
45.3948	6.9731								0	0			20.7261	2.34603	45.3948	0.552694
45.5731	6.9113								0	0			20.5855	2.32037	45.5731	0.553756
45.7522	6.85004								0	0			20.4459	2.29499	45.7522	0.554821
45.9319	6.78932								0	0			20.3073	2.26986	45.9319	0.555888
46.1124	6.72914								0	0			20.1698	2.24501	46.1124	0.556957
46.2935	6.66949								0	0			20.0333	2.22041	46.2935	0.558029
46.4754	6.61037								0	0			19.8978	2.19608	46.4754	0.559103
46.658	6.55178								0	0			19.7633	2.172	46.658	0.56018
46.8413	6.49371								0	0			19.6298	2.14817	46.8413	0.561259
47.0253	6.43615								0	0			19.4974	2.1246	47.0253	0.562341
47.2101	6.3791								0	0			19.3659	2.10127	47.2101	0.563425
47.3955	6.32256								0	0			19.2354	2.07819	47.3955	0.564511
47.5817	6.26651								0	0			19.1058	2.05535	47.5817	0.5656
47.7687	6.21097								0	0			18.9773	2.03276	47.7687	0.566691
47.9563	6.15592								0	0			18.8496	2.0104	47.9563	0.567785
48.1447	6.10135								0	0			18.723	1.98828	48.1447	0.568882
48.3339	6.04727								0	0			18.5972	1.96639	48.3339	0.56998
48.5238	5.99367								0	0			18.4724	1.94474	48.5238	0.571082
48.7144	5.94054								0	0			18.3486	1.92331	48.7144	0.572185
48.9058	5.88788								0	0			18.2256	1.90211	48.9058	0.573291
49.0979	5.83569								0	0			18.1036	1.88114	49.0979	0.5744
49.2908	5.78397								0	0			17.9825	1.86038	49.2908	0.575511
49.4845	5.7327								0	0			17.8622	1.83985	49.4845	0.576625
49.6789	5.68189								0	0			17.7429	1.81954	49.6789	0.577741
49.8741	5.63152								0	0			17.6244	1.79944	49.8741	0.578859
50.07	5.58161								0	0			17.5069	1.77955	50.07	0.57998
50.2667	5.53213								0	0			17.3901	1.75988	50.2667	0.581104
50.4642	5.4831								0	0			17.2743	1.74041	50.4642	0.58223
50.6624	5.43449								0	0			17.1593	1.72115	50.6624	0.583358
50.8615	5.38632								0	0			17.0452	1.7021	50.8615	0.584489
51.0613	5.33858								0	0			16.9319	1.68324	51.0613	0.585623
51.2619	5.29126								0	0			16.8194	1.66459	51.2619	0.586759
51.4633	5.24436								0	0			16.7077	1.64614	51.4633	0.587897
51.6655	5.19787								0	0			16.5969	1.62788	51.6655	0.589038
51.8685	5.1518								0	0			16.4869	1.60982	51.8685	0.590182
52.0722	5.10614								0	0			16.3778	1.59195	52.0722	0.591328
52.2768	5.06088								0	0			16.2694	1.57427	52.2768	0.592476
52.4822	5.01602								0	0			16.1618	1.55678	52.4822	0.593627
52.6884	4.97156								0	0			16.055	1.53948	52.6884	0.594781
52.8954	4.92749								0	0			15.949	1.52236	52.8954	0.595937
53.1032	4.88381								0	0			15.8438	1.50543	53.1032	0.597096
53.3118	4.84052								0	0			15.7393	1.48867	53.3118	0.598257
53.5212	4.79762								0	0			15.6356	1.4721	53.5212	0.599421
53.7315	4.75509								0	0			15.5327	1.4557	53.7315	0.600587
53.9426	4.71294								0	0			15.4305	1.43947	53.9426	0.601756
54.1545	4.67117								0	0			15.3291	1.42343	54.1545	0.602927
54.3673	4.62976								0	0			15.2284	1.40755	54.3673	0.604101
54.5809	4.58873								0	0			15.1285	1.39184	54.5809	0.605277
54.7953	4.54805								0	0			15.0292	1.3763	54.7953	0.606456
55.0106	4.50774								0	0			14.9308	1.36093	55.0106	0.607638
55.2267	4.46778								0	0			14.833	1.34572	55.2267	0.608822
55.4437	4.42818								0	0			14.7359	1.33068	55.4437	0.610009
55.6615	4.38893								0	0			14.6396	1.31579	55.6615	0.611198
55.8802	4.35003								0	0			14.544	1.30107	55.8802	0.61239
56.0997	4.31147								0	0			14.449	1.28651	56.0997	0.613584
56.3201	4.27325								0	0			14.3548	1.2721	56.3201	0.614781
56.5414	4.23538								0	0			14.2612	1.25785	56.5414	0.615981
56.7635	4.19783								0	0			14.1683	1.24375	56.7635	0.617183
56.9865	4.16063								0	0			14.0761	1.2298	56.9865	0.618388
57.2104	4.12375								0	0			13.9846	1.216	57.2104	0.619595
57.4351	4.08719								0	0			13.8937	1.20235	57.4351	0.620805
57.6608	4.05097								0	0			13.8035	1.18885	57.6608	0.622018
57.8873	4.01506								0	0			13.714	1.17549	57.8873	0.623233
58.1147	3.97947								0	0			13.6251	1.16228	58.1147	0.62445
58.3431	3.9442								0	0			13.5368	1.14921	58.3431	0.625671
58.5723	3.90924								0	0			13.4492	1.13628	58.5723	0.626894
58.8024	3.87459								0	0			13.3623	1.12349	58.8024	0.628119
59.0334	3.84024								0	0			13.2759	1.11084	59.0334	0.629348
59.2653	3.8062								0	0			13.1902	1.09833	59.2653	0.630578
59.4982	3.77246								0	0			13.1051	1.08595	59.4982	0.631812
59.7319	3.73903								0	0			13.0206	1.07371	59.7319	0.633048
59.9666	3.70588								0	0			12.9368	1.06159	59.9666	0.634287
60.2022	3.67304								0	0			12.8535	1.04961	60.2022	0.635528
60.4387	3.64048								0	0			12.7708	1.03776	60.4387	0.636772
60.6761	3.60821								0	0			12.6888	1.02604	60.6761	0.638019
60.9145	3.57623								0	0			12.6073	1.01444	60.9145	0.639268
61.1538	3.54453								0	0			12.5264	1.00297	61.1538	0.64052
61.3941	3.51311												12.4461	0.991628	61.3941	0.641774
61.6353	3.48197												12.3664	0.980406	61.6353	0.643032
61.8774	3.45111												12.2873	0.969306	61.8774	0.644291
62.1205	3.42052												12.2087	0.958326	62.1205	0.645554
62.3646	3.3902												12.1307	0.947466	62.3646	0.646819
62.6096	3.36015												12.0533	0.936724	62.6096	0.648087
62.8555	3.33036												11.9764	0.926099	62.8555	0.649358
63.1025	3.30084												11.9001	0.915589	63.1025	0.650631
63.3504	3.27159												11.8243	0.905194	63.3504	0.651907
63.5993	3.24259												11.749	0.894913	63.5993	0.653186
63.8491	3.21385												11.6743	0.884743	63.8491	0.654467
64.1	3.18536												11.6002	0.874685	64.1	0.655751
64.3518	3.15712												11.5266	0.864736	64.3518	0.657038
64.6046	3.12914												11.4535	0.854895	64.6046	0.658327
64.8584	3.1014												11.3809	0.845163	64.8584	0.659619
65.1132	3.07391												11.3088	0.835536	65.1132	0.660914
65.3691	3.04667												11.2373	0.826015	65.3691	0.662212
65.6259	3.01966												11.1663	0.816598	65.6259	0.663512
65.8837	2.9929												11.0958	0.807284	65.8837	0.664815
66.1425	2.96637												11.0257	0.798071	66.1425	0.666121
66.4024	2.94007												10.9562	0.78896	66.4024	0.667429
66.6633	2.91401												10.8872	0.779949	66.6633	0.66874
66.9252	2.88818												10.8187	0.771036	66.9252	0.670054
67.1881	2.86258												10.7507	0.762221	67.1881	0.671371
67.452	2.83721												10.6831	0.753503	67.452	0.672691
67.717	2.81206												10.6161	0.74488	67.717	0.674013
67.9831	2.78714												10.5495	0.736352	67.9831	0.675338
68.2502	2.76243												10.4834	0.727918	68.2502	0.676665
68.5183	2.73794												10.4177	0.719576	68.5183	0.677996
68.7875	2.71368												10.3525	0.711327	68.7875	0.679329
69.0577	2.68962												10.2878	0.703168	69.0577	0.680665
69.329	2.66578												10.2236	0.695098	69.329	0.682004
69.6014	2.64215												10.1598	0.687118	69.6014	0.683345
69.8748	2.61873												10.0965	0.679225	69.8748	0.68469
70.1494	2.59552												10.0336	0.67142	70.1494	0.686037
70.425	2.57251												9.97112	0.6637	70.425	0.687387
70.7016	2.54971												9.90912	0.656066	70.7016	0.688739
70.9794	2.52711												9.84756	0.648515	70.9794	0.690095
71.2583	2.50471												9.78644	0.641049	71.2583	0.691453
71.5382	2.48251												9.72575	0.633664	71.5382	0.692814
71.8193	2.46051												9.66549	0.626362	71.8193	0.694178
72.1014	2.4387												9.60566	0.61914	72.1014	0.695545
72.3847	2.41708												9.54625	0.611997	72.3847	0.696914
72.6691	2.39566												9.48726	0.604934	72.6691	0.698287
72.9545	2.37442												9.42869	0.597949	72.9545	0.699662
73.2412	2.35337												9.37053	0.591042	73.2412	0.70104
73.5289	2.33251												9.31278	0.584211	73.5289	0.702421
73.8178	2.31184												9.25544	0.577455	73.8178	0.703805
74.1078	2.29135												9.19851	0.570775	74.1078	0.705191
74.3989	2.27104												9.14197	0.564168	74.3989	0.706581
74.6912	2.25091												9.08584	0.557635	74.6912	0.707973
74.9847	2.23096												9.0301	0.551175	74.9847	0.709368
75.2792	2.21118												8.97475	0.544786	75.2792	0.710766
75.575	2.19158												8.9198	0.538469	75.575	0.712167
75.8719	2.17216												8.86523	0.532221	75.8719	0.71357
76.17	2.1529												8.81104	0.526043	76.17	0.714977
76.4692	2.13382												8.75723	0.519934	76.4692	0.716387
76.7697	2.11491												8.70381	0.513893	76.7697	0.717799
77.0713	2.09616												8.65075	0.507919	77.0713	0.719214
77.374	2.07758												8.59807	0.502012	77.374	0.720632
77.678	2.05916												8.54576	0.496171	77.678	0.722053
77.9832	2.04091												8.49382	0.490394	77.9832	0.723477
78.2896	2.02282												8.44224	0.484683	78.2896	0.724904
78.5971	2.00489												8.39102	0.479035	78.5971	0.726334
78.9059	1.98712												8.34016	0.47345	78.9059	0.727767
79.2159	1.96951												8.28966	0.467927	79.2159	0.729202
79.5271	1.95205												8.23951	0.462467	79.5271	0.730641
79.8396	1.93475												8.18971	0.457067	79.8396	0.732082
80.1532	1.9176												8.14026	0.451728	80.1532	0.733527
80.4681	1.9006												8.09115	0.446448	80.4681	0.734974
80.7843	1.88375												8.04239	0.441228	80.7843	0.736424
81.1016	1.86706												7.99397	0.436066	81.1016	0.737877
81.4203	1.85051												7.94588	0.430962	81.4203	0.739334
81.7401	1.8341												7.89813	0.425916	81.7401	0.740793
82.0613	1.81785												7.85072	0.420926	82.0613	0.742255
82.3837	1.80173												7.80363	0.415992	82.3837	0.74372
82.7073	1.78576												7.75687	0.411113	82.7073	0.745188
83.0323	1.76993												7.71044	0.40629	83.0323	0.746659
83.3585	1.75425												7.66433	0.40152	83.3585	0.748133
83.686	1.7387												7.61854	0.396804	83.686	0.74961
84.0147	1.72329												7.57307	0.392142	84.0147	0.75109
84.3448	1.70801												7.52791	0.387531	84.3448	0.752573
84.6762	1.69287												7.48307	0.382973	84.6762	0.754059
85.0088	1.67787												7.43854	0.378466	85.0088	0.755548
85.3428	1.66299												7.39431	0.37401	85.3428	0.75704
85.6781	1.64825												7.3504	0.369604	85.6781	0.758535
86.0147	1.63364												7.30679	0.365248	86.0147	0.760033
86.3526	1.61916												7.26348	0.360941	86.3526	0.761534
86.6919	1.60481												7.22047	0.356683	86.6919	0.763038
87.0324	1.59059												7.17776	0.352473	87.0324	0.764545
87.3744	1.57649												7.13534	0.34831	87.3744	0.766055
87.7176	1.56251												7.09322	0.344195	87.7176	0.767568
88.0623	1.54866												7.05139	0.340126	88.0623	0.769084
88.4082	1.53494												7.00984	0.336103	88.4082	0.770604
88.7556	1.52133												6.96859	0.332126	88.7556	0.772126
89.1042	1.50785												6.92761	0.328194	89.1042	0.773651
89.4543	1.49448												6.88692	0.324306	89.4543	0.77518
89.8057	1.48123												6.84652	0.320463	89.8057	0.776711
90.1586	1.4681												6.80639	0.316663	90.1586	0.778246
90.5128	1.45509												6.76653	0.312907	90.5128	0.779784
90.8684	1.44219												6.72695	0.309193	90.8684	0.781325
91.2254	1.42941												6.68764	0.305521	91.2254	0.782868
91.5838	1.41674												6.64861	0.301891	91.5838	0.784415
91.9436	1.40418												6.60984	0.298302	91.9436	0.785966
92.3048	1.39174												6.57134	0.294754	92.3048	0.787519
92.6674	1.3794												6.5331	0.291247	92.6674	0.789075
93.0315	1.36717												6.49512	0.28778	93.0315	0.790634
93.397	1.35505												6.45741	0.284352	93.397	0.792197
93.7639	1.34304												6.41995	0.280963	93.7639	0.793763
94.1323	1.33114												6.38275	0.277613	94.1323	0.795332
94.5021	1.31934												6.3458	0.274301	94.5021	0.796904
94.8733	1.30765												6.30911	0.271027	94.8733	0.798479
95.2461	1.29606												6.27267	0.26779	95.2461	0.800057
95.6203	1.28457												6.23648	0.26459	95.6203	0.801638
95.9959	1.27318												6.20054	0.261427	95.9959	0.803223
96.3731	1.2619												6.16484	0.258301	96.3731	0.804811
96.7517	1.25071												6.12938	0.255209	96.7517	0.806402
97.1318	1.23962												6.09417	0.252154	97.1318	0.807996
97.5134	1.22864												6.0592	0.249133	97.5134	0.809593
97.8965	1.21775												6.02446	0.246147	97.8965	0.811193
98.2811	1.20695												5.98997	0.243196	98.2811	0.812797
98.6672	1.19625												5.9557	0.240278	98.6672	0.814404
99.0548	1.18565												5.92168	0.237393	99.0548	0.816014
99.444	1.17514												5.88788	0.234542	99.444	0.817627
99.8347	1.16472												5.85431	0.231724	99.8347	0.819244
100.227	1.1544												5.82097	0.228938	100.227	0.820863
100.621	1.14417												5.78786	0.226184	100.621	0.822486
101.016	1.13403												5.75497	0.223462	101.016	0.824113
101.413	1.12397												5.72231	0.220771	101.413	0.825742
101.811	1.11401												5.68987	0.218111	101.811	0.827375
102.211	1.10414												5.65765	0.215482	102.211	0.82901
102.613	1.09435												5.62564	0.212883	102.613	0.83065
103.016	1.08465												5.59386	0.210314	103.016	0.832292
103.421	1.07504												5.56229	0.207775	103.421	0.833938
103.827	1.06551												5.53093	0.205265	103.827	0.835587
104.235	1.05606												5.49978	0.202784	104.235	0.837239
104.644	1.0467												5.46885	0.200332	104.644	0.838894
105.055	1.03742												5.43813	0.197908	105.055	0.840553
105.468	1.02823												5.40761	0.195512	105.468	0.842215
105.883	1.01911												5.3773	0.193144	105.883	0.843881
106.299	1.01008												5.34719	0.190804	106.299	0.845549
106.716	1.00113												5.31729	0.18849	106.716	0.847221
107.135	0.992254												5.28759	0.186204	107.135	0.848896
107.556	0.983459												5.25809	0.183944	107.556	0.850575
107.979	0.974742												5.22878	0.18171	107.979	0.852257
108.403	0.966102												5.19968	0.179502	108.403	0.853942
108.829	0.957539												5.17077	0.17732	108.829	0.855631
109.256	0.949051												5.14206	0.175163	109.256	0.857323
109.686	0.940639												5.11354	0.173031	109.686	0.859018
110.117	0.932301												5.08521	0.170924	110.117	0.860717
110.549	0.924038												5.05707	0.168842	110.549	0.862419
110.984	0.915847												5.02912	0.166784	110.984	0.864124
111.42	0.907729												5.00136	0.16475	111.42	0.865833
111.857	0.899683												4.97378	0.162739	111.857	0.867545
112.297	0.891708												4.94639	0.160752	112.297	0.869261
112.738	0.883805												4.91919	0.158789	112.738	0.87098
113.181	0.875971												4.89216	0.156848	113.181	0.872702
113.626	0.868206												4.86532	0.15493	113.626	0.874428
114.072	0.86051												4.83866	0.153034	114.072	0.876157
114.52	0.852883												4.81217	0.15116	114.52	0.877889
114.97	0.845323												4.78586	0.149309	114.97	0.879625
115.422	0.83783												4.75973	0.147479	115.422	0.881365
115.875	0.830404												4.73378	0.14567	115.875	0.883107
116.33	0.823043												4.70799	0.143883	116.33	0.884854
116.787	0.815748												4.68238	0.142117	116.787	0.886603
117.246	0.808517												4.65694	0.140371	117.246	0.888356
117.707	0.801351												4.63167	0.138646	117.707	0.890113
118.169	0.794248												4.60657	0.136941	118.169	0.891873
118.634	0.787208												4.58163	0.135257	118.634	0.893637
119.1	0.78023												4.55687	0.133592	119.1	0.895404
119.567	0.773314												4.53226	0.131946	119.567	0.897174
120.037	0.76646												4.50782	0.13032	120.037	0.898948
120.509	0.759666												4.48355	0.128713	120.509	0.900726
120.982	0.752932												4.45943	0.127125	120.982	0.902507
121.458	0.746258												4.43548	0.125556	121.458	0.904291
121.935	0.739644												4.41168	0.124006	121.935	0.906079
122.414	0.733088												4.38804	0.122473	122.414	0.90787
122.895	0.72659												4.36456	0.120959	122.895	0.909665
123.378	0.720149												4.34124	0.119463	123.378	0.911464
123.862	0.713766												4.31807	0.117984	123.862	0.913266
124.349	0.707439												4.29505	0.116523	124.349	0.915072
124.837	0.701169												4.27219	0.115079	124.837	0.916881
125.328	0.694954												4.24947	0.113652	125.328	0.918694
125.82	0.688794												4.22691	0.112242	125.82	0.92051
126.314	0.682688												4.2045	0.110849	126.314	0.92233
126.811	0.676637												4.18223	0.109472	126.811	0.924153
127.309	0.670639												4.16012	0.108112	127.309	0.92598
127.809	0.664695												4.13815	0.106768	127.809	0.927811
128.311	0.658803												4.11632	0.105439	128.311	0.929645
128.815	0.652964												4.09464	0.104127	128.815	0.931483
129.321	0.647176												4.0731	0.10283	129.321	0.933324
129.829	0.64144												4.0517	0.101549	129.829	0.935169
130.34	0.635754												4.03045	0.100282	130.34	0.937018
130.852	0.630119												4.00933	0.0990313	130.852	0.93887
131.366	0.624533												3.98836	0.0977951	131.366	0.940726
131.882	0.618998												3.96752	0.0965737	131.882	0.942586
132.4	0.613511												3.94682	0.0953668	132.4	0.944449
132.92	0.608073												3.92626	0.0941743	132.92	0.946316
133.442	0.602683												3.90583	0.0929961	133.442	0.948186
133.966	0.597341												3.88553	0.091832	133.966	0.95006
134.493	0.592046												3.86537	0.0906817	134.493	0.951938
135.021	0.586798												3.84534	0.0895453	135.021	0.95382
135.552	0.581597												3.82545	0.0884224	135.552	0.955705
136.084	0.576442												3.80568	0.087313	136.084	0.957594
136.619	0.571332												3.78604	0.0862168	136.619	0.959486
137.156	0.566268												3.76654	0.0851338	137.156	0.961383
137.694	0.561249												3.74716	0.0840638	137.694	0.963283
138.235	0.556274												3.7279	0.0830067	138.235	0.965186
138.778	0.551343												3.70878	0.0819622	138.778	0.967094
139.324	0.546456												3.68978	0.0809303	139.324	0.969005
139.871	0.541613												3.6709	0.0799107	139.871	0.97092
140.42	0.536812												3.65214	0.0789035	140.42	0.972839
140.972	0.532054												3.63351	0.0779083	140.972	0.974761
141.526	0.527338												3.61501	0.0769252	141.526	0.976687
142.082	0.522663												3.59662	0.0759539	142.082	0.978617
142.64	0.518031												3.57835	0.0749942	142.64	0.980551
143.201	0.513439												3.5602	0.0740462	143.201	0.982488
143.763	0.508888												3.54217	0.0731096	143.763	0.98443
144.328	0.504377												3.52426	0.0721843	144.328	0.986375
144.895	0.499906												3.50646	0.0712702	144.895	0.988324
145.464	0.495475												3.48878	0.0703671	145.464	0.990276
146.036	0.491083												3.47122	0.069475	146.036	0.992233
146.609	0.486731												3.45377	0.0685936	146.609	0.994193
147.185	0.482416												3.43643	0.0677229	147.185	0.996157
147.764	0.47814												3.41921	0.0668628	147.764	0.998125
148.344	0.473902												3.4021	0.0660131	148.344	1.0001
148.927	0.469701												3.3851	0.0651737	148.927	1.00207
149.512	0.465538												3.36821	0.0643445	149.512	1.00405
150.099	0.461412												3.35143	0.0635253	150.099	1.00604
150.689	0.457322												3.33476	0.0627161	150.689	1.00802
151.281	0.453268												3.3182	0.0619167	151.281	1.01001
151.876	0.44925												3.30174	0.0611271	151.876	1.01201
152.472	0.445268												3.2854	0.060347	152.472	1.01401
153.071	0.441322												3.26915	0.0595765	153.071	1.01601
153.673	0.43741												3.25302	0.0588153	153.673	1.01802
154.276	0.433533												3.23699	0.0580634	154.276	1.02003
154.882	0.42969												3.22106	0.0573207	154.882	1.02204
155.491	0.425881												3.20523	0.0565871	155.491	1.02406
156.102	0.422106												3.18951	0.0558624	156.102	1.02608
156.715	0.418365												3.17389	0.0551465	156.715	1.02811
157.331	0.414656												3.15837	0.0544394	157.331	1.03014
157.949	0.410981												3.14295	0.053741	157.949	1.03217
158.569	0.407338												3.12763	0.0530511	158.569	1.03421
159.192	0.403727												3.11241	0.0523696	159.192	1.03626
159.818	0.400149												3.09729	0.0516965	159.818	1.0383
160.446	0.396602												3.08227	0.0510317	160.446	1.04035
161.076	0.393087												3.06734	0.0503749	161.076	1.04241
161.709	0.389602												3.05251	0.0497263	161.709	1.04446
162.344	0.386149												3.03777	0.0490856	162.344	1.04653
162.982	0.382726												3.02313	0.0484528	162.982	1.04859
163.622	0.379334												3.00859	0.0478278	163.622	1.05066
164.265	0.375971												2.99414	0.0472104	164.265	1.05274
164.91	0.372639												2.97978	0.0466007	164.91	1.05482
165.558	0.369336												2.96551	0.0459985	165.558	1.0569
166.209	0.366062												2.95134	0.0454036	166.209	1.05898
166.862	0.362817												2.93725	0.0448162	166.862	1.06107
167.517	0.359601												2.92326	0.0442359	167.517	1.06317
168.175	0.356414												2.90936	0.0436629	168.175	1.06527
168.836	0.353255												2.89555	0.0430969	168.836	1.06737
169.499	0.350124												2.88182	0.0425378	169.499	1.06948
170.165	0.34702												2.86819	0.0419858	170.165	1.07159
170.834	0.343944												2.85464	0.0414405	170.834	1.0737
171.505	0.340896												2.84118	0.040902	171.505	1.07582
172.179	0.337874												2.8278	0.0403701	172.179	1.07794
172.855	0.334879												2.81451	0.0398449	172.855	1.08007
173.534	0.331911												2.80131	0.0393261	173.534	1.0822
174.216	0.328969												2.78819	0.0388138	174.216	1.08434
174.9	0.326053												2.77516	0.0383079	174.9	1.08648
175.588	0.323163												2.76221	0.0378082	175.588	1.08862
176.277	0.320298												2.74934	0.0373148	176.277	1.09077
176.97	0.317459												2.73655	0.0368275	176.97	1.09292
177.665	0.314645												2.72385	0.0363462	177.665	1.09508
178.363	0.311856												2.71123	0.035871	178.363	1.09724
179.064	0.309092												2.69868	0.0354017	179.064	1.09941
179.767	0.306352												2.68622	0.0349382	179.767	1.10157
180.474	0.303637												2.67384	0.0344805	180.474	1.10375
181.183	0.300945												2.66154	0.0340285	181.183	1.10593
181.894	0.298278												2.64932	0.0335821	181.894	1.10811
182.609	0.295634												2.63717	0.0331414	182.609	1.11029
183.326	0.293014												2.6251	0.0327061	183.326	1.11248
184.047	0.290416												2.61311	0.0322763	184.047	1.11468
184.77	0.287842												2.6012	0.0318519	184.77	1.11688
185.496	0.285291												2.58936	0.0314328	185.496	1.11908
186.224	0.282762												2.5776	0.0310189	186.224	1.12129
186.956	0.280256												2.56591	0.0306103	186.956	1.1235
187.691	0.277772												2.5543	0.0302067	187.691	1.12571
188.428	0.275309												2.54276	0.0298082	188.428	1.12793
189.168	0.272869												2.5313	0.0294148	189.168	1.13016
189.911	0.27045												2.51991	0.0290263	189.911	1.13239
190.657	0.268053												2.50859	0.0286426	190.657	1.13462
191.406	0.265677												2.49734	0.0282638	191.406	1.13686
192.158	0.263322												2.48616	0.0278898	192.158	1.1391
192.913	0.260988												2.47506	0.0275205	192.913	1.14135
193.671	0.258675												2.46403	0.0271558	193.671	1.1436
194.432	0.256382												2.45307	0.0267958	194.432	1.14585
195.196	0.254109												2.44217	0.0264402	195.196	1.14811
195.963	0.251857												2.43135	0.0260892	195.963	1.15038
196.733	0.249625												2.42059	0.0257426	196.733	1.15264
197.506	0.247412												2.40991	0.0254004	197.506	1.15492
198.282	0.245219												2.39929	0.0250626	198.282	1.15719
199.061	0.243045												2.38874	0.024729	199.061	1.15947
199.843	0.240891												2.37826	0.0243996	199.843	1.16176
200.628	0.238756												2.36784	0.0240744	200.628	1.16405
201.416	0.23664												2.35749	0.0237534	201.416	1.16634
202.207	0.234542												2.34721	0.0234364	202.207	1.16864
203.002	0.232463												2.33699	0.0231234	203.002	1.17095
203.799	0.230403												2.32683	0.0228144	203.799	1.17326
204.6	0.22836												2.31674	0.0225094	204.6	1.17557
205.404	0.226336												2.30672	0.0222082	205.404	1.17788
206.211	0.22433												2.29676	0.0219109	206.211	1.18021
207.021	0.222342												2.28686	0.0216173	207.021	1.18253
207.834	0.220371												2.27702	0.0213275	207.834	1.18486
208.651	0.218417												2.26725	0.0210414	208.651	1.1872
209.47	0.216481												2.25754	0.020759	209.47	1.18954
210.293	0.214563												2.24789	0.0204801	210.293	1.19188
211.119	0.212661												2.2383	0.0202048	211.119	1.19423
211.949	0.210776												2.22878	0.0199331	211.949	1.19658
212.782	0.208907												2.21931	0.0196648	212.782	1.19894
213.617	0.207056												2.2099	0.0194	213.617	1.2013
214.457	0.20522												2.20056	0.0191385	214.457	1.20367
215.299	0.203401												2.19127	0.0188804	215.299	1.20604
216.145	0.201598												2.18204	0.0186256	216.145	1.20842
216.994	0.199812												2.17287	0.0183741	216.994	1.2108
217.847	0.19804												2.16376	0.0181258	217.847	1.21318
218.703	0.196285												2.15471	0.0178808	218.703	1.21557
219.562	0.194545												2.14571	0.0176388	219.562	1.21797
220.424	0.192821												2.13677	0.0174	220.424	1.22037
221.29	0.191112												2.12789	0.0171642	221.29	1.22277
222.16	0.189418												2.11907	0.0169315	222.16	1.22518
223.033	0.187739												2.1103	0.0167018	223.033	1.22759
223.909	0.186075												2.10158	0.0164751	223.909	1.23001
224.788	0.184425												2.09292	0.0162513	224.788	1.23243
225.672	0.182791												2.08432	0.0160304	225.672	1.23486
226.558	0.18117												2.07577	0.0158123	226.558	1.23729
227.448	0.179564												2.06728	0.015597	227.448	1.23973
228.342	0.177973												2.05884	0.0153846	228.342	1.24217
229.239	0.176395												2.05045	0.0151749	229.239	1.24462
230.14	0.174832												2.04211	0.0149679	230.14	1.24707
231.044	0.173282												2.03383	0.0147636	231.044	1.24952
231.951	0.171746												2.0256	0.0145619	231.951	1.25198
232.863	0.170224												2.01743	0.0143629	232.863	1.25445
233.777	0.168715												2.0093	0.0141665	233.777	1.25692
234.696	0.167219												2.00123	0.0139726	234.696	1.25939
235.618	0.165737												1.99321	0.0137812	235.618	1.26187
236.544	0.164268												1.98524	0.0135923	236.544	1.26436
237.473	0.162812												1.97732	0.0134059	237.473	1.26685
238.406	0.161369												1.96945	0.0132219	238.406	1.26934
239.343	0.159939												1.96163	0.0130404	239.343	1.27184
240.283	0.158521												1.95386	0.0128612	240.283	1.27434
241.227	0.157116												1.94614	0.0126843	241.227	1.27685
242.175	0.155723												1.93847	0.0125097	242.175	1.27937
243.126	0.154343												1.93085	0.0123375	243.126	1.28188
244.081	0.152975												1.92327	0.0121674	244.081	1.28441
245.04	0.151619												1.91575	0.0119997	245.04	1.28693
246.003	0.150275												1.90827	0.0118341	246.003	1.28947
246.969	0.148943												1.90084	0.0116707	246.969	1.29201
247.939	0.147623												1.89345	0.0115094	247.939	1.29455
248.914	0.146314												1.88612	0.0113502	248.914	1.2971
249.891	0.145017												1.87883	0.0111932	249.891	1.29965
250.873	0.143732												1.87159	0.0110382	250.873	1.30221
251.859	0.142458												1.86439	0.0108852	251.859	1.30477
252.848	0.141195												1.85724	0.0107343	252.848	1.30734
253.842	0.139944												1.85013	0.0105853	253.842	1.30991
254.839	0.138703												1.84307	0.0104383	254.839	1.31249
255.84	0.137474												1.83606	0.0102933	255.84	1.31507
256.845	0.136255												1.82909	0.0101501	256.845	1.31766
257.854	0.135048												1.82216	0.0100089	257.854	1.32025
258.867	0.13385												1.81528	0.00986953	258.867	1.32285
259.884	0.132664												1.80844	0.009732	259.884	1.32545
[truncated: 63 more columns]
